# Supplementary figures and images for: Electroencephalography functional connectivity—A biomarker for painful polyneuropathy
Source: PubMed Central journal article supplement — Eur J Neurol. 2022 Oct 26;30(1):204–14. doi: 10.1111/ene.15575 (PMC10092565; doi:10.1111/ene.15575), 2022-10-26

A)

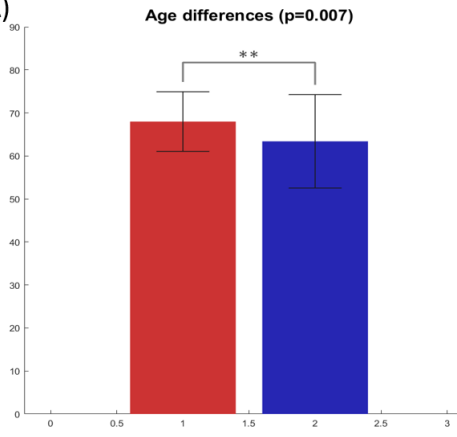

B)

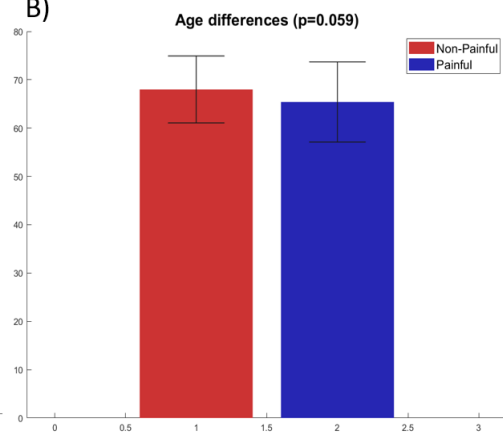

Supplement: ENE-30-204-s001.pdf [file ENE-30-204-s001.pdf]

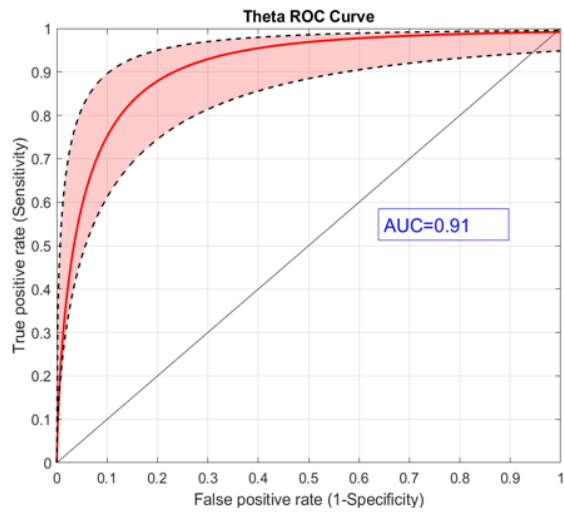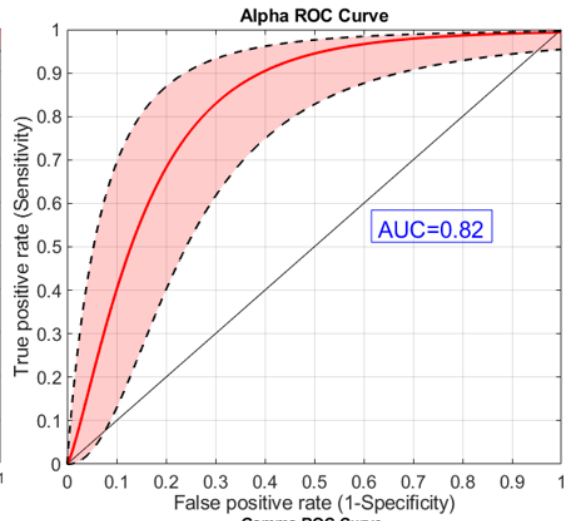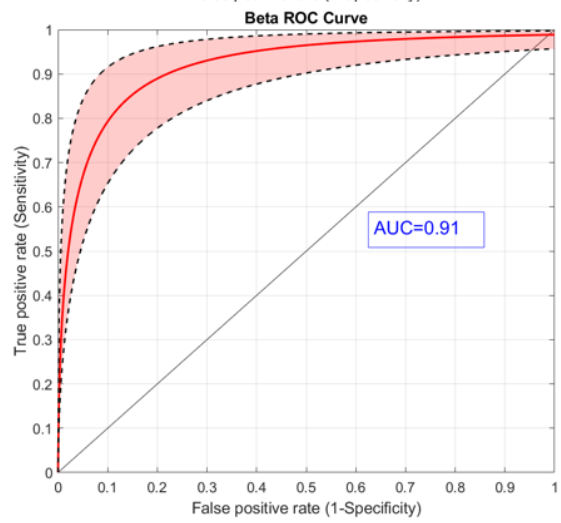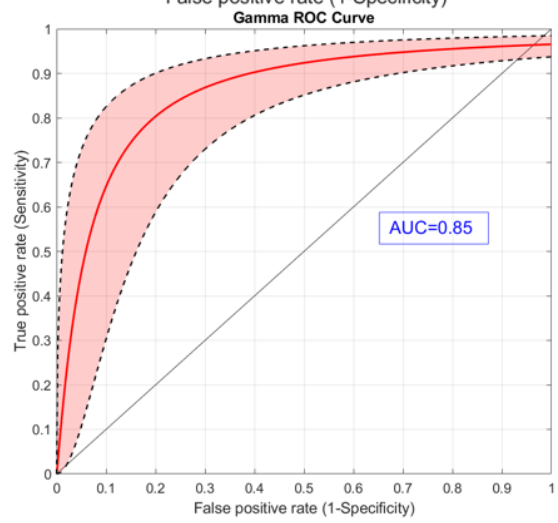

Supplement: ENE-30-204-s002.pdf [file ENE-30-204-s002.pdf]
